# Supplementary material for: The Lived Experience of Young Adult Cancer Survivors after Treatment: A Qualitative Study
Source: MDPI journal article supplement (doi:10.3390/nu15143145), 2023-07-14
Supplement: s1 [file s1]

**Table S1.** Interview Question Examples.

| Question                                                                                                                     |
|------------------------------------------------------------------------------------------------------------------------------|
| What symptoms, either related to the cancer or side-effects of treatment, did you experience?                                |
| Did you have any symptoms or side-effects that impacted your ability to eat a balanced diet? If so, which ones?              |
| <ul style="list-style-type: none"><li>○ PROBE: How did they impact you?</li></ul>                                            |
| <ul style="list-style-type: none"><li>○ PROBE: How often did you experience them?</li></ul>                                  |
| Did you have any symptoms or side-effects that impacted your ability to participate in physical activity? If so, which ones? |
| <ul style="list-style-type: none"><li>○ PROBE: How did they impact you?</li></ul>                                            |
| <ul style="list-style-type: none"><li>○ PROBE: How often did you experience them?</li></ul>                                  |
| What parts of your life were most impacted by your cancer experience?                                                        |
| <ul style="list-style-type: none"><li>○ PROBE: What parts of your life were most impacted by cancer treatment?</li></ul>     |
